# Supplementary material for: Carbonaceous material export from Siberian permafrost tracked across the Arctic Shelf using Raman spectroscopy
Source: Copernicus journal article supplement (doi:10.5194/tc-2018-16), 2018-03-09
Supplement: Supplementary file 1 [file Sample Metadata.xlsx]

## Sheet: Supp Table 1
Sample locations, metadata, and number of spectra in each class
Sample	Latitude	Longitude	Water Depth	Distance from	Distance from	TOC	δ13COC	D14COC	TN	δ15N		Total	Disordered	Intermediate	Midly Graphitised	Highly Graphitised		Disordered	Intermediate	Midly Graphitised	Highly Graphitised
				River Outflows	Mainland							Spectra	Spectra	Spectra	Spectra	Spectra		Spectra	Spectra	Spectra	Spectra
	°N	°E	m	km	km	mg / g	‰	‰	mg / g	‰		(number)	(number)	(number)	(number)	(number)		%	%	%	%
Terrestrial Samples
KURa	72.33	126.28	N/A	N/A	N/A	n.d.	n.d.	n.d.	n.d.	n.d.		80	54	20	4	2		0.675	0.25	0.05	0.025
CHb	69.46	161.79	N/A	N/A	N/A	16.8c	-25.7c	n.d.	n.d.	n.d.		84	34	47	2	1		0.404762	0.559524	0.0238095	0.0119048
KYb	70.83	147.49	N/A	N/A	N/A	15.6c	-25.6c	n.d.	n.d.	n.d.		81	14	60	6	1		0.17284	0.740741	0.0740741	0.0123457
BKB - nearshore
TB-30	71.8667	129.833	5	44.7677	11.1803	20.4	-26	n.d.	n.d.	3.316		27	7	14	6	0		0.259259	0.518519	0.222222	0
TB-46	72.7009	130.175	6	28.3136	20.6155	25.8	-26.5	-436	n.d.	1.367		22	5	14	2	1		0.227273	0.636364	0.0909091	0.0454545
TB-47*	72.4503	130.125	n.d..	25.0259	14.1421	27.8	n.d.	n.d.	n.d.	n.d.		44	13	19	9	3		0.295455	0.431818	0.204545	0.0681818
TB-59	72.0916	130.063	11	30.4453	15.8114	18.7	-26	-493	n.d.	2.136		17	2	13	2	0		0.117647	0.764706	0.117647	0
YS-9	73.366	129.997	55	55.2841	40	13.5	n.d.	n.d.	n.d.	n.d.		22	5	13	4	0		0.227273	0.590909	0.181818	0
BKB - offshore
TB-17	72.2907	132.921	21	117.808	36.0555	15.1	-25.6	n.d.	n.d.	3.316		28	7	8	13	0		0.25	0.285714	0.464286	0
TB-23	71.8256	131.668	20	97.1831	25.4951	15.9	-25.8	n.d.	n.d.	3.316		19	4	10	4	1		0.210526	0.526316	0.210526	0.0526316
TB-33*	72.0919	131.088	14.5	65.0674	53.8516	21.9	-25.8	n.d.	n.d.	3.4		53	15	24	14	0		0.283019	0.45283	0.264151	0
TB-34	72.2868	131.088	16	62.7148	49.4975	18.5	-25.7	-526	n.d.	2.9		27	4	16	6	1		0.148148	0.592593	0.222222	0.037037
TB-43	72.8915	131.931	21.8	90.2323	77.7817	15.6	-25.6	-517	n.d.	2.739		26	4	16	5	1		0.153846	0.615385	0.192308	0.0384615
YS-15	71.628	130.054	11	70.0726	20	26	n.d.	n.d.	n.d.	n.d.		27	3	14	9	1		0.111111	0.518519	0.333333	0.037037
YS-17	71.63	130.191	10	75.0778	25.4951	13.5	n.d.	n.d.	n.d.	n.d.		17	2	9	6	0		0.117647	0.529412	0.352941	0
Indigirka Outflow
YS-26	72.46	150.596	16	96.1465	47.4342	8.7	-27.4	-741	1.03325	5.27		9	1	5	3	0		0.111111	0.555556	0.333333	0
YS-27	72.567	152.373	18	127.608	105	4.1	-26.2	n.d.	0.59593	6.03		9	2	6	1	0		0.222222	0.666667	0.111111	0
YS-28	72.651	154.185	28	172.878	159.765	8.7	-26.2	-672	1.2536	6.43		25	2	20	3	0		0.08	0.8	0.12	0
YS-29	72.2	153.166	18	110.794	98.2344	6.3	-26.6	n.d.	0.804598	5.68		29	11	10	6	2		0.37931	0.344828	0.206897	0.0689655
YS-30	71.358	152.153	9	42.4704	20	13.5	-27.4	-682	1.52542	5.03		23	1	16	6	0		0.0434783	0.695652	0.26087	0
YS-116	74.5828	157.003	36	403.531	367.696	6	-25.5	-682	0.904977	7		28	2	18	7	1		0.0714286	0.642857	0.25	0.0357143
YS-120	73.2918	155.167	33	250.859	226.991	9.9	-25	-600	1.47761	7.62		11	1	6	3	1		0.0909091	0.545455	0.272727	0.0909091
Kolyma Outflow
YS-34*	69.71	162.69	10	31.6556	5	11.2	-27.3	-554	1.1245	4.24		28	9	11	6	2		0.321429	0.392857	0.214286	0.0714286
YS-35	69.817	164.057	31	85.675	5	12.2	-26.8	n.d.	1.36618	5.9		21	2	14	4	1		0.0952381	0.666667	0.190476	0.047619
YS-36	69.817	165.999	32	160.478	29.1548	8	-26	-547	1.17647	6.69		27	1	21	5	0		0.037037	0.777778	0.185185	0
YS-38	70.698	169.132	36	306.258	82.7647	10	-25.3	-462	1.5456	8.17		24	3	18	3	0		0.125	0.75	0.125	0
YS-39	71.219	169.373	44	340.389	130.863	12.3	-24.3	n.d.	2.0098	8.8		30	5	22	3	0		0.166667	0.733333	0.1	0
YS-40	71.483	170.553	49	391.334	157.003	13.6	-23.9	-425	2.20421	9.34		30	5	18	6	1		0.166667	0.6	0.2	0.0333333
YS-41	71.968	171.792	43	459.415	215.058	13.2	-23.9	n.d.	2.17105	9.34		28	3	14	10	1		0.107143	0.5	0.357143	0.0357143
Coastal Erosion
YS-20	73.305	139.893	8	232.674	55.9017	3.9	-26.9	n.d.	0.562771	4.63		28	15	9	4	0		0.535714	0.321429	0.142857	0
YS-22*	72.875	140.629	20	206.733	0	11.8	-27.4	-716	1.27155	4.5		42	6	23	9	4		0.142857	0.547619	0.214286	0.0952381
YS-23	72.789	142.67	10	256.488	7.07107	9.1	-27.2	n.d.	1.02709	5.11		30	10	17	3	0		0.333333	0.566667	0.1	0
YS-24	73.048	142.667	15	270.326	35.3553	7.7	-27.4	n.d.	0.853659	4.97		30	10	11	8	1		0.333333	0.366667	0.266667	0.0333333
YS-31	71.592	161.694	20	229.202	127.475	5.6	-26.5	-624	0.848485	6.81		30	13	10	6	1		0.433333	0.333333	0.2	0.0333333
YS-32	70.567	161.217	9	111.133	50	4.2	-26.4	n.d.	0.636364	6.66		24	4	12	7	1		0.166667	0.5	0.291667	0.0416667
YS-33	70.168	161.217	8	67.3379	43.0116	4	-26.2	n.d.	0.617284	6.35		30	13	12	4	1		0.433333	0.4	0.133333	0.0333333
YS-37*	70.135	168.007	42	245.305	20	9.4	-25.7	n.d.	1.4093	7.91		30	16	9	5	0		0.533333	0.3	0.166667	0
ESAS Slope
YS-4	75.987	129.984	50	293.306	280.402	13.4	-24.3	-437	1.66874	n.d.		24	5	13	5	1		0.208333	0.541667	0.208333	0.0416667
YS-5	75.266	130.017	43	212.116	207.184	14.8	n.d.	n.d.	n.d.	n.d.		15	3	7	3	2		0.2	0.466667	0.2	0.133333
YS-6	74.724	130.016	32	158.04	152.971	18.6	-25.6	-465	1.96617	n.d.		25	10	10	2	3		0.4	0.4	0.08	0.12
YS-90	74.6682	172.388	63	683.075	519.23	8.5	-22.4	-332	1.51246	9.38		29	9	11	6	3		0.310345	0.37931	0.206897	0.103448
YS-91	74.4337	170.855	56	637.685	488.365	8.2	-23.3	n.d.	1.4539	9.55		30	14	10	6	0		0.47	0.33	0.09	0
YS-93	74.4185	165.999	51	571.775	464.247	8	-23.8	-398	1.46789	9.65		35	11	17	2	5		0.314286	0.485714	0.0571429	0.142857
YS-99*	75.171	163.586	50	585.607	505.223	7.7	-23.4	n.d.	1.41284	8.83		29	10	11	8	0		0.344828	0.37931	0.275862	0
YS-100	75.7157	164.079	58	635.718	567.032	7.6	-22.4	n.d.	1.31944	8.96		24	9	8	5	2		0.375	0.333333	0.208333	0.0833333
YS-102	76.5592	160.072	69	633.685	588.6	7.7	-22.3	-476	1.39746	8.87		9	0	4	2	3		0	0.444444	0.222222	0.333333
YS-104	76.9338	155.169	57	616.837	555.99	9.1	-23.1	n.d.	1.55556	8.98		25	2	7	2	14		0.08	0.28	0.08	0.56
YS-106	76.9685	150.291	43	600.956	515.388	8.7	-23.8	n.d.	1.43564	7.9		20	1	14	4	1		0.05	0.7	0.2	0.05
YS-112	74.8327	159.33	42	470.194	434.166	8.8	-24.6	n.d.	1.42626	7.95		30	10	14	6	0		0.333333	0.466667	0.2	0
YS-131	76.3982	125.473	50	336.689	277.849	4	-24.3	n.d.	0.60423	6.31		30	8	13	5	4		0.266667	0.433333	0.166667	0.133333
a Further details of Kurungnakh Island core can be found in Bischoff et al. (2013). Global Biogeochemical Cycles 27, 305-317.
b Further details of KYEX3 and CHYED 2 samples can be found in Tesi et al. (2014). Geochimica et Cosmochimica Acta 133, 235–256.
n.d. = no data available
Samples marked with a * were previously solvent-extracted

## Sheet: Supp Table 2
Principal Component Results for samples excluding YS-102 and YS-104
Sample		Principal Component Analysis
		PC1	PC2	PC3	PC4
Terrestrial Samples
KUR		-0.504475	0.160394	0.0269419	0.0139762
CH		-0.0894181	0.21789	0.0233604	-0.000476809
KY		0.202867	0.17069	0.0121831	-0.0045332
BKB - nearshore
TB-30		-0.00638517	-0.0144604	0.0437116	0.0016828
TB-46		0.0899156	0.130899	-0.0216976	0.00598534
TB-47		-0.101534	-0.0263015	-0.0324885	0.0016696
TB-59		0.255599	0.120656	0.0262912	-0.000425928
YS-9		0.0617245	0.0378216	0.038467	0.00128224
BKB - offshore
TB-17		-0.146967	-0.315259	0.0625837	0.000849345
TB-23		0.0337473	-0.02297	-0.0155768	0.000323
TB-33		-0.0674266	-0.0705512	0.0459724	-0.00307708
TB-34		0.119329	-0.0265671	-0.00770839	-0.000619652
TB-43		0.138666	0.0111175	-0.0101503	-0.000536765
YS-15		0.104866	-0.16203	-0.00140653	-0.001605
YS-17		0.107353	-0.16826	0.0450122	-0.00106139
Indigirka Outflow
YS-26		0.134353	-0.142458	0.0427214	-0.00117649
YS-27		0.120952	0.126431	0.0321064	0.00130528
YS-28		0.312036	0.12337	0.0236395	-0.00110736
YS-29		-0.220854	-0.0442919	-0.0263712	0.00300484
YS-30		0.278236	-0.0497774	0.0323833	-0.0021756
YS-116		0.212867	-0.058823	-0.0105699	-0.00206541
YS-120		0.134898	-0.109767	-0.062776	-0.00231558
Kolyma Outflow
YS-34		-0.143239	-0.0447076	-0.0326696	-0.00300739
YS-35		0.208881	0.0141051	-0.0221759	0.00349439
YS-36		0.330396	0.0426409	0.0290065	0.00300788
YS-38		0.242085	0.111903	0.030089	0.00470688
YS-39		0.197944	0.142386	0.0279779	0.000481121
YS-40		0.111374	0.00209162	0.00302151	-0.00011655
YS-41		0.0925706	-0.195227	0.00335624	0.00330219
Coastal Erosion
YS-20		-0.34988	0.0670312	0.0557617	0.00667386
YS-22		0.0956529	-0.0426839	-0.0753771	-0.00140514
YS-23		-0.0278042	0.131528	0.0385846	0.00320685
YS-24		-0.159493	-0.0966968	0.0193259	0.00241578
YS-31		-0.262508	-0.0200394	0.0179365	-0.00067731
YS-32		0.0459924	-0.115855	-0.000684852	-0.000472338
YS-33		-0.21739	0.0678915	0.0122388	-0.000483907
YS-37		-0.355108	0.0300251	0.0575406	0.00642062
ESAS Slope
YS-4		0.0411192	-0.0180772	-0.00454484	0.000430127
YS-5		-0.00467272	-0.0488725	-0.10531	-0.000676747
YS-6		-0.20214	0.0931869	-0.0907867	0.00316909
YS-90		-0.144204	-0.0542202	-0.0641075	0.00149095
YS-91		-0.29634	0.0852279	0.0215216	-0.0492713
YS-93		-0.0770097	0.114632	-0.120445	0.00147687
YS-99		-0.157932	-0.0952585	0.0538987	0.00287989
YS-100		-0.228226	-0.0491847	-0.0374032	0.00289771
YS-106		0.265941	0.000449169	-0.0269975	-0.0023751
YS-112		-0.092259	0.0059125	0.0467241	0.00293056
YS-131		-0.0841011	-0.015938	-0.103111	0.000598647

## Sheet: Supp Table 3
Principal Component Results for samples excluding YS-102 and YS-104
Sample		Principal Component Analysis
		PC1	PC2	PC3	PC4
Terrestrial Samples
KUR		-0.506	0.153	-0.072	-0.013
CH		-0.092	0.194	-0.117	0.001
KY		0.201	0.152	-0.097	0.005
BKB - nearshore
TB-30		-0.007	0.035	0.053	-0.001
TB-46		0.088	0.099	-0.094	-0.006
TB-47		-0.102	-0.025	0.005	-0.002
TB-59		0.254	0.124	-0.053	0.001
YS-9		0.061	0.07	0.013	-0.001
BKB - offshore
TB-17		-0.145	-0.176	0.27	-0.001
TB-23		0.033	-0.011	0.014	-0.001
TB-33		-0.067	-0.005	0.092	0.004
TB-34		0.119	-0.008	0.021	0
TB-43		0.138	0.018	-0.006	0
YS-15		0.105	-0.105	0.117	0.001
YS-17		0.108	-0.078	0.156	0.001
Indigirka Outflow
YS-26		0.135	-0.06	0.136	0.001
YS-27		0.12	0.132	-0.052	-0.001
YS-28		0.311	0.124	-0.058	0.001
YS-29		-0.221	-0.034	0.023	-0.003
YS-30		0.278	0.002	0.065	0.002
YS-116		0.213	-0.034	0.04	0.002
YS-120		0.135	-0.107	0.036	0.001
Kolyma Outflow
YS-34		-0.144	-0.039	0.017	0.002
YS-35		0.208	0.013	-0.017	-0.004
YS-36		0.33	0.068	0	-0.003
YS-38		0.241	0.12	-0.045	-0.004
YS-39		0.196	0.141	-0.066	0
YS-40		0.111	0.02	0.01	0
YS-41		0.093	-0.126	0.143	-0.004
Coastal Erosion
YS-20		-0.351	0.103	0.01	-0.006
YS-22		0.095	-0.066	-0.018	0
YS-23		-0.029	0.14	-0.049	-0.003
YS-24		-0.159	-0.043	0.091	-0.002
YS-31		-0.263	0.013	0.04	0.001
YS-32		0.046	-0.07	0.087	0
YS-33		-0.218	0.075	-0.024	0.001
YS-37		-0.356	0.077	0.036	-0.006
ESAS Slope
YS-4		0.041	0	0.019	-0.001
YS-5		-0.006	-0.09	-0.035	-0.001
YS-6		-0.204	0.024	-0.118	-0.004
YS-90		-0.145	-0.067	0.001	-0.002
YS-91		-0.297	0.093	-0.028	0.05
YS-93		-0.079	0.021	-0.155	-0.003
YS-99		-0.158	-0.018	0.116	-0.002
YS-100		-0.229	-0.046	0.018	-0.003
YS-102		0.109	-0.332	-0.134	0.006
YS-104		-0.078	-0.459	-0.365	-0.001
YS-106		0.265	-0.001	-0.012	0.002
YS-112		-0.093	0.052	0.042	-0.002
YS-131		-0.085	-0.065	-0.055	-0.002
