# Supplementary material for: Carbonaceous material export from Siberian permafrost tracked across the Arctic Shelf using Raman spectroscopy
Source: Copernicus journal article supplement (doi:10.5194/tc-2018-16), 2018-03-09

- BKB - nearshore
- Indigirka River outflow
- Coastal Erosion Areas
- Terrestrial Samples
- BKB - offshore
- Kolyma River outflow
- Distal ESAS

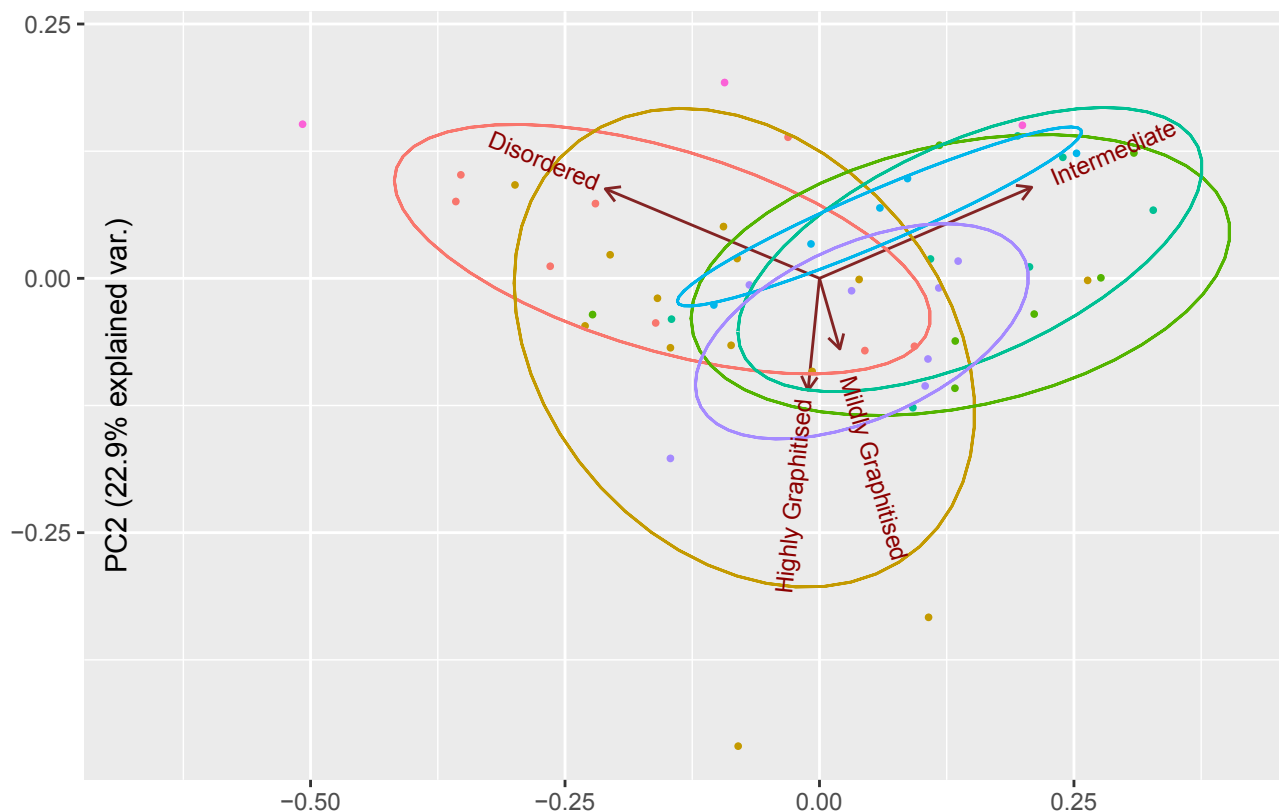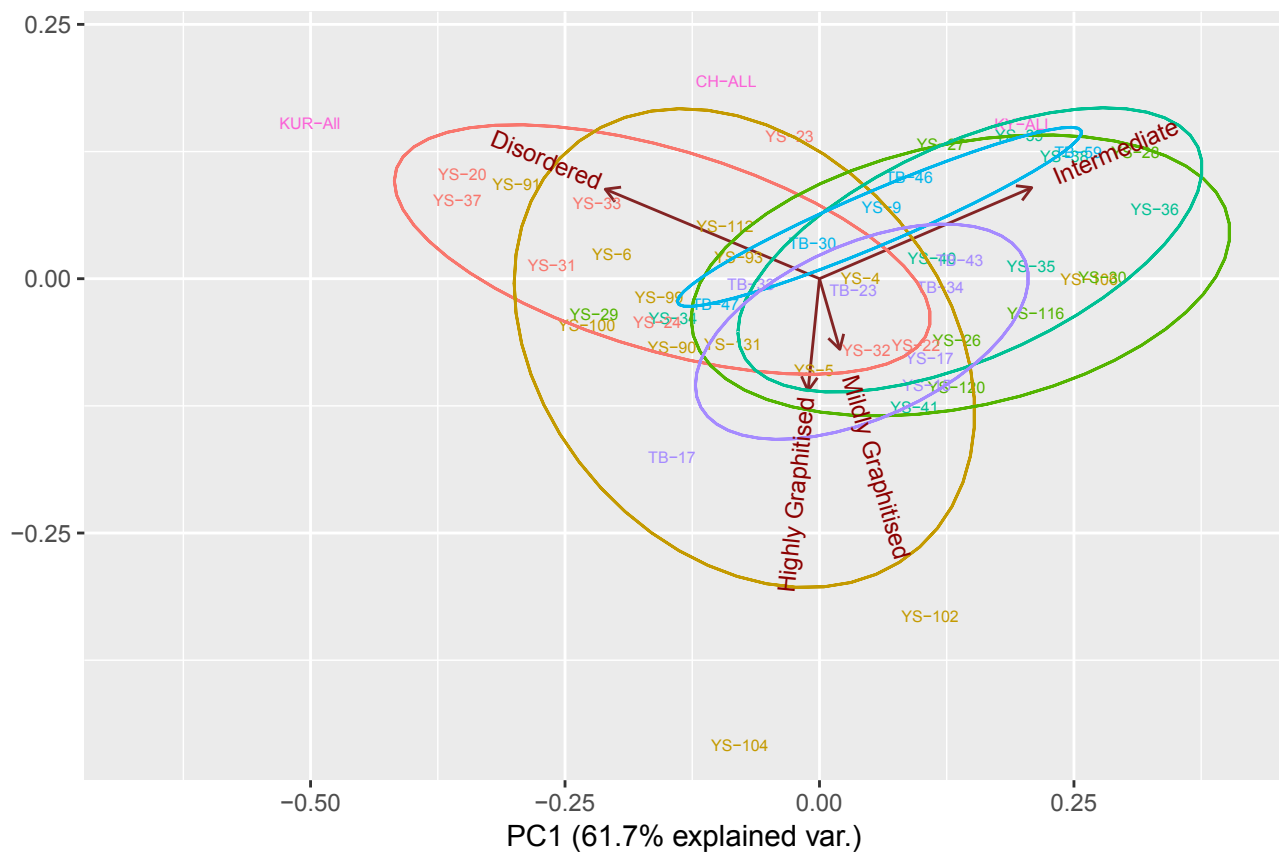

Supplement: Supplementary file 1 [file tc-2018-16-supplement.zip]
