# Supplementary figures and images for: Carbonaceous material export from Siberian permafrost tracked across the Arctic Shelf using Raman spectroscopy
Source: Copernicus journal article supplement (doi:10.5194/tc-2018-16), 2018-03-09

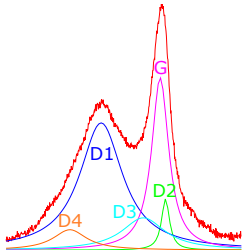

Disordered / Intermediate

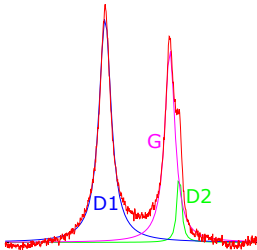

Mildly Graphitised

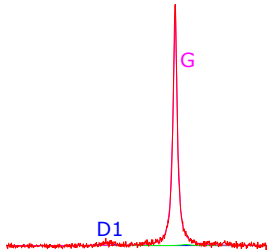

Highly Graphitised

Supplement: Supplementary file 2 [file tc-2018-16-supplement.zip]

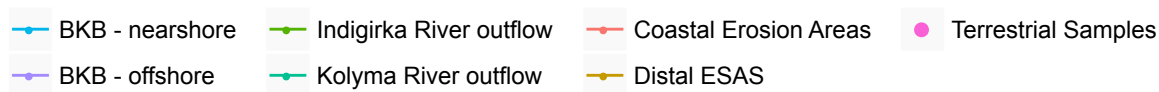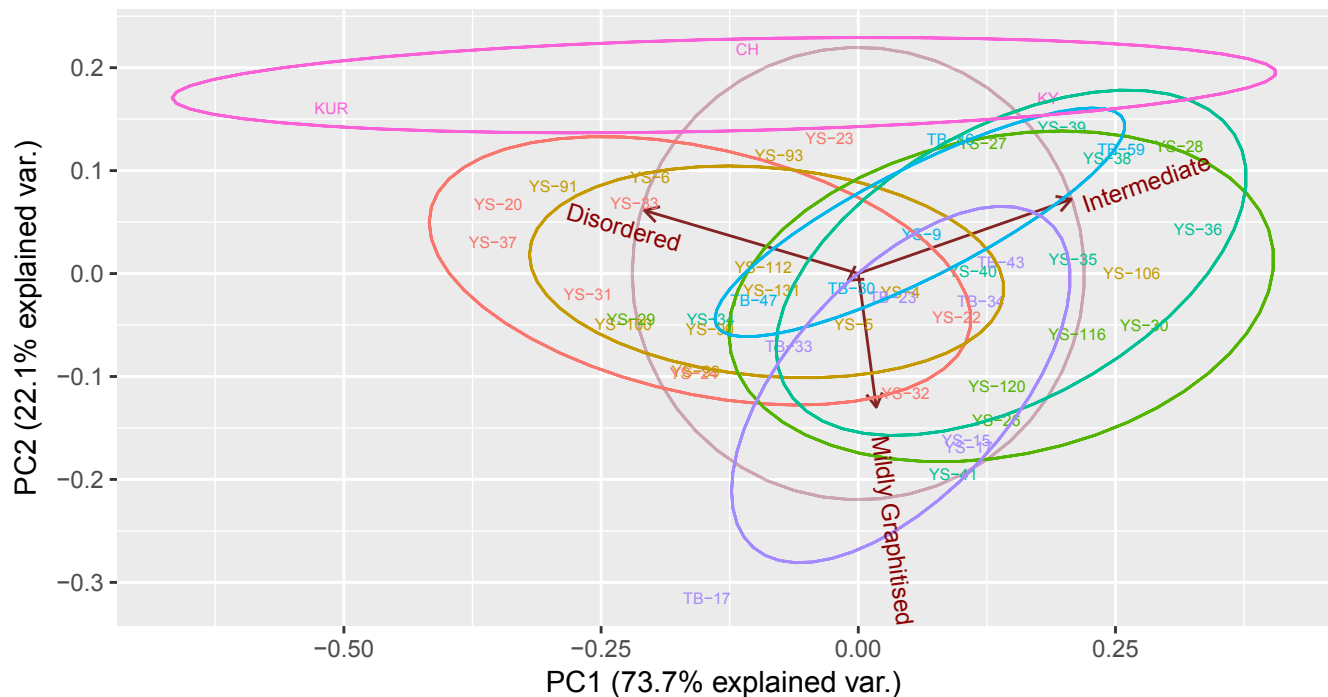

Supplement: Supplementary file 3 [file tc-2018-16-supplement.zip]
